# Supplementary material for: Prognostic factors for laryngeal sarcoma and nomogram development for prediction: a retrospective study based on SEER database
Source: PubMed Central journal article supplement — Ann Transl Med. 2020 Apr;8(8):545. doi: 10.21037/atm-20-2970 (PMC7214913; doi:10.21037/atm-20-2970), 2020-04
Supplement: atm-08-08-545-dss.pdf [file atm-08-08-545-dss.pdf]

## Data Sharing Statement

|                               |                                                                                             |                                                                                             |
|-------------------------------|---------------------------------------------------------------------------------------------|---------------------------------------------------------------------------------------------|
| <b>Article information</b>    | <a href="http://dx.doi.org/10.21037/atm-20-2970">http://dx.doi.org/10.21037/atm-20-2970</a> |                                                                                             |
| <b>Section</b>                | <b>Question</b>                                                                             | <b>Authors' Response<br/>(place "-" if not applicable)</b>                                  |
| Data collected for your study | Will the data collected for your study be made available to others?                         | Yes                                                                                         |
|                               | If not, would you like to share the reason for your decision?                               | -                                                                                           |
|                               | What data in particular will be shared?                                                     | All data can be shared                                                                      |
|                               | Any additional information about data?                                                      | Yes                                                                                         |
|                               | How or where can the data be obtained?                                                      | <a href="https://seer.cancer.gov/data-software/">https://seer.cancer.gov/data-software/</a> |
|                               | When will data availability begin?                                                          | Data can be downloaded at any time in the SEER database                                     |
|                               | When will data availability end?                                                            | The deadline is based on the requirements of the website                                    |
| Supporting documents          | Will any supporting documents be available?                                                 | No                                                                                          |
|                               | Which supporting documents?                                                                 | -                                                                                           |
|                               | Any additional information about supporting documents?                                      | No                                                                                          |
|                               | How or where can supporting documents be obtained?                                          | -                                                                                           |
|                               | When will supporting documents availability begin?                                          | -                                                                                           |
|                               | When will supporting documents availability end?                                            | -                                                                                           |
| Restrictions                  | To whom will data be available?                                                             | Registered SEER database users can obtain data                                              |
|                               | For what type of analysis or purpose?                                                       | Data can be used for prognostic survival factor analysis                                    |
|                               | By what mechanism?                                                                          | Through SPSS software and R software                                                        |
|                               | Any other restrictions?                                                                     | No                                                                                          |

|                        |    |
|------------------------|----|
| Additional information | No |
|------------------------|----|
